# Supplementary material
Source: Springer Nature journal article supplement (https://www.springermedizin.de/resource/supplementary/12885_2011_3022_MOESM7_ESM.pdf/9462756)

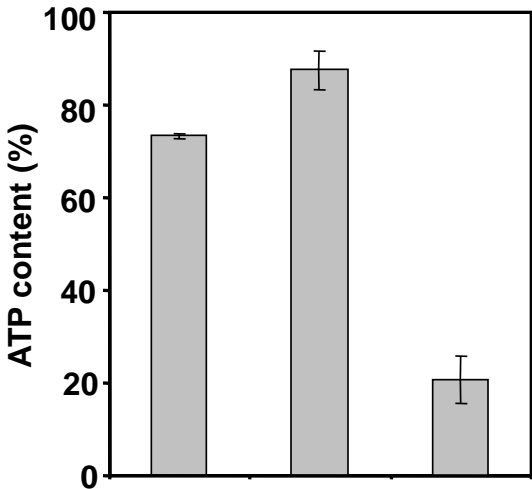

**CHIR-124 (EC20)**

**+**

**-**

**+**

**Gemc (EC20)**

**-**

**+**

**+**

Supplement: MOESM7 [file 9462756]
